# Supplementary material for: Simulated Dopamine Modulation of a Neurorobotic Model of the Basal Ganglia
Source: MDPI journal article supplement (doi:10.3390/biomimetics9030139), 2024-02-25
Supplement: s1 [file s1]

Simulated dopamine modulation of a neurorobotic model of the basal ganglia. MDPI Biomimetics, 2024.

Authors: Tony J. Prescott, Fernando M. Montes Gonzalez, Kevin Gurney, Mark D. Humphries, and Peter Redgrave.

## SOURCE CODE

1. All code is in written C++, and authored by Tony J. Prescott and Fernando Montes.
2. This code is made available on a CC\_BY license that allows free use and modification. Please cite the authors. No warranty is offered or implied. Most files include some comments, for an overview of the system see Supplementary\_Methods. This code is provided FOR INFORMATION AND RESEARCH USE ONLY we are unable to provide support for third-party use of this software.
3. The basal ganglia model can be run in standalone model using the “bg” and “test\_bg” libraries. The header file “bg/bg\_extended\_f.h” includes the version of the extended basal ganglia discussed/tested in the article.
4. All other files and folders relate to the embedded model. This code requires Webots 2.0 from [www.cyberbotics.com](http://www.cyberbotics.com) to run in simulation, the WEBOTS\_HOME library to be installed (see “makefile”) including relevant header files for Khepera 1 robot (see “robot/motor\_plant.h”). The GUI was developed for the Unix operating system. The main control loop is in “biras.cpp” (BIRAS= Brain Inspired Robot Action Selection).
5. For the physical robot, the Khepera gripper module is required. The code is designed to operate the robot via an umbilical cable and has not been tested for remote operation.

## Contents of Folders

### FOLDER: BG

afferent.cpp: methods for the afferent class (defined in basal\_ganglia.h)  
basal\_ganglia.h: basal ganglia class and methods  
bg/bg\_basic\_f.h: Method for customising the basic basal ganglia model  
bg/bg\_extended.h: Method for customising the extended basal ganglia model  
da\_leaky.h: Dopamine (DA) modulation for leaky integrator neurons  
leaky.h: Leaky neuron class  
nucleus.cpp: Nucleus class and methods

### FOLDER: CTRL

controller\_gui.h: gui\_flag and controller\_gui classes  
controller.h: class for controlling experiments  
ctrl/ctrl\_motivated.h: Controller method for customising model (sets parameters for robot and embedding architecture)  
experiment.h: Controller methods for running/analysing a robot experiment

ctrl/wall\_follower.h: Controller method for simpler wall-following robot

#### FOLDER: ROBOT

behaviour.h: class definition for action subsystems  
forage.h: action sub-system classes for Khepera 'foraging' behaviour  
motivation.h: motivational sub-systems  
motor\_plant.h: motor post-processing functions  
percept.h: perceptual sub-systems  
robot.h: definitions for robot interface  
sensory\_sys.h: sensory sub-systems  
subsys.h: base class of basal ganglia input subsystems

#### FOLDER: TEST\_BG

benchmark.cpp: test/benchmark program  
grad.cpp: test/benchmark program for gradually changing salience inputs  
mult.cpp: test/benchmark program for multi-channel (5) salience inputs  
step.cpp: test/benchmark program for step change salience inputs  
selection.cpp: test/benchmark program for gradual change with hysteresis

#### FOLDER: UI

ethogram\_window.h: window class for displaying behavioural activity  
graph\_window.h: window class for displaying graphs  
interface.h: class for managing all windows  
iwindow.h: base window class for user interface  
monitor\_window.h: window class for showing bg nuclei activation  
observer\_log.h: class and methods for generating Observer Pro data files  
percepts\_window.h: window class for displaying perceptual variables  
salience\_window.h: window class for displaying behavioural salience  
percepts\_window.h: window class for displaying perceptual variables  
percepts\_window.h: window class for displaying perceptual variables  
tools\_window.h: window class for online control of model basal ganglia

#### FOLDER: UTILS

bout.h: object for storing record of behavioural data  
bv\_stat.h: stores contour plot data for a bivariate variable  
data\_log.h: class and methods for logging model activity  
io.h: stores and calculates statistics relating to a variable  
timer.h: timer and timer\_stat classes
